# Supplementary material for: Genetic divergence and phylogeographic history of two closely related species (Leucomeris decora and Nouelia insignis) across the 'Tanaka Line' in Southwest China
Source: PubMed Central journal article supplement (PMC4495643; doi:10.1186/s12862-015-0374-5), 2015-07-08
Supplement: 12862_2015_374_MOESM3_ESM.pdf [file 12862_2015_374_MOESM3_ESM.pdf]

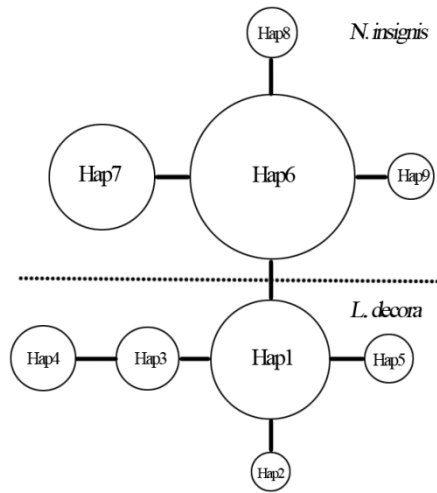

**Figure S1.. Statistical parsimony network of genealogical relationships between 9 haplotypes derived from nDNA sequences of *Leucomeris decora* and *Nouelia insignis* without recombinations.** Letters in/around circles represent haplotypes at each locus. The size of the circles corresponds to the frequency of each haplotype and each solid line represents one mutational step.
