# Supplementary material for: Genetic divergence and phylogeographic history of two closely related species (Leucomeris decora and Nouelia insignis) across the 'Tanaka Line' in Southwest China
Source: PubMed Central journal article supplement (PMC4495643; doi:10.1186/s12862-015-0374-5), 2015-07-08
Supplement: 12862_2015_374_MOESM4_ESM.pdf [file 12862_2015_374_MOESM4_ESM.pdf]

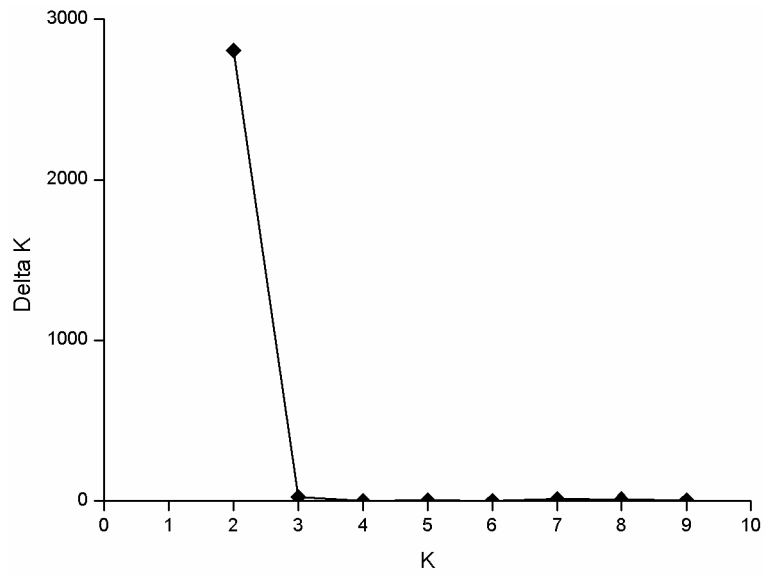

**Figure S2. The plots of delta K value and number of clusters (K) implemented by STRUCTURE.**
